# Supplementary material for: A black carbon peak and its sources in the free troposphere of Beijing induced by cyclone lifting and transport from central China
Source: Copernicus journal article supplement (doi:10.5194/acp-21-15555-2021), 2021-10-18
Supplement: Supplementary file 1 [file acp-21-15555-2021-supplement.pdf]

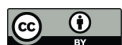

*Supplement of*

## **A black carbon peak and its sources in the free troposphere of Beijing induced by cyclone lifting and transport from central China**

**Zhenbin Wang et al.**

*Correspondence to:* Bin Zhu (binzhu@nuist.edu.cn)

The copyright of individual parts of the supplement might differ from the article licence.

**Table S1.** Statistical indicators for evaluating the simulation results in HN.

| Variables                               | IOA  | MB                     | RMSE         | MNB                      | MFB                    | TE              |
|-----------------------------------------|------|------------------------|--------------|--------------------------|------------------------|-----------------|
| T (°C)                                  | 0.98 | -0.24<br>([-0.5, 0.5]) | 2<br>(≤ 2.0) | -0.04<br>([-0.15, 0.15]) | -0.03<br>([-0.6, 0.6]) | 1.58<br>(≤ 2.0) |
| RH                                      | 0.99 | -8.05                  | <b>11.62</b> | -0.15<br>([-0.15, 0.15]) | -0.11<br>([-0.6, 0.6]) | 9.43            |
| WS (m·s <sup>-1</sup> )                 | 0.55 | 1.45                   | <b>2.17</b>  | <b>0.57</b>              | 0.38<br>([-0.6, 0.6])  | 1.73            |
| WD (m·s <sup>-1</sup> )                 | 0.92 | -14.8                  | 93.54        | -0.1<br>([-0.15, 0.15])  | -0.4<br>([-0.6, 0.6])  | <b>54.11</b>    |
| BC (μg·m <sup>-3</sup> )                | 0.64 | 0.52                   | 2.2          | 0.24                     | 0.18                   | 1.49            |
| PM <sub>2.5</sub> (μg·m <sup>-3</sup> ) | 0.71 | 9.72                   | 33.84        | 0.2                      | 0.15                   | 26.26           |

Values that do not meet the threshold criteria are shown in bold.

**Table S2.** Statistical indicators for evaluating the simulation results in SX.

| Variables                               | IOA  | MB                     | RMSE            | MNB                      | MFB                    | TE              |
|-----------------------------------------|------|------------------------|-----------------|--------------------------|------------------------|-----------------|
| T (°C)                                  | 0.99 | -0.25<br>([-0.5, 0.5]) | 1.89<br>(≤ 2.0) | -0.05<br>([-0.15, 0.15]) | 0.01<br>([-0.6, 0.6])  | 2.55<br>(≤ 2.0) |
| RH                                      | 0.97 | -4.26                  | <b>14.54</b>    | -0.09<br>([-0.15, 0.15]) | -0.01<br>([-0.6, 0.6]) | 11.52           |
| WS (m·s <sup>-1</sup> )                 | 0.54 | 1.44                   | <b>2.43</b>     | <b>0.52</b>              | 0.37<br>([-0.6, 0.6])  | 1.83<br>(≤ 2.0) |
| WD (m·s <sup>-1</sup> )                 | 0.79 | 16.09                  | 140.23          | 0.08<br>([-0.15, 0.15])  | 0.2<br>([-0.6, 0.6])   | <b>98.91</b>    |
| BC (μg·m <sup>-3</sup> )                | 0.77 | 0.17                   | 0.46            | 0.22                     | 0.16                   | 0.28            |
| PM <sub>2.5</sub> (μg·m <sup>-3</sup> ) | 0.69 | 3.66                   | 32.29           | 0.08                     | 0.24                   | 25.82           |

Values that do not meet the threshold criteria are shown in bold.

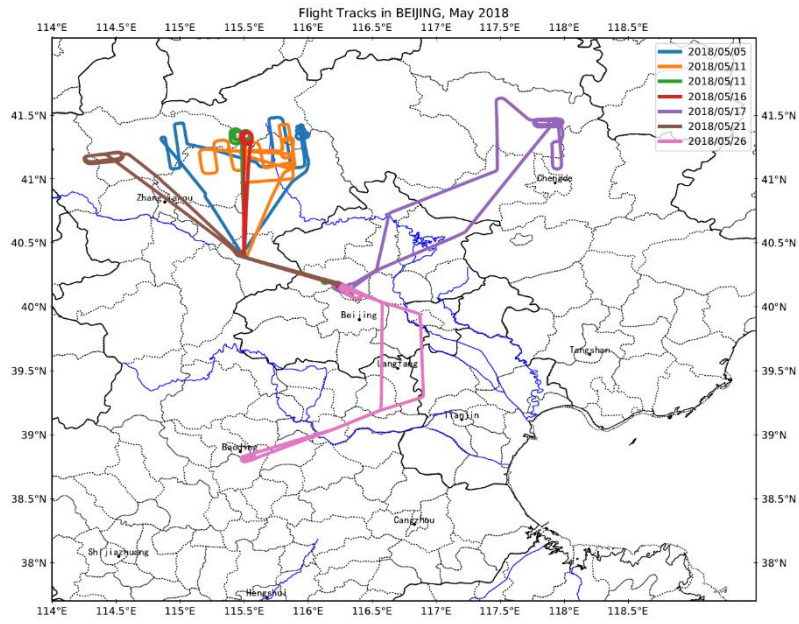

**Figure S1.** Flight tracks in BJ, May 2018.

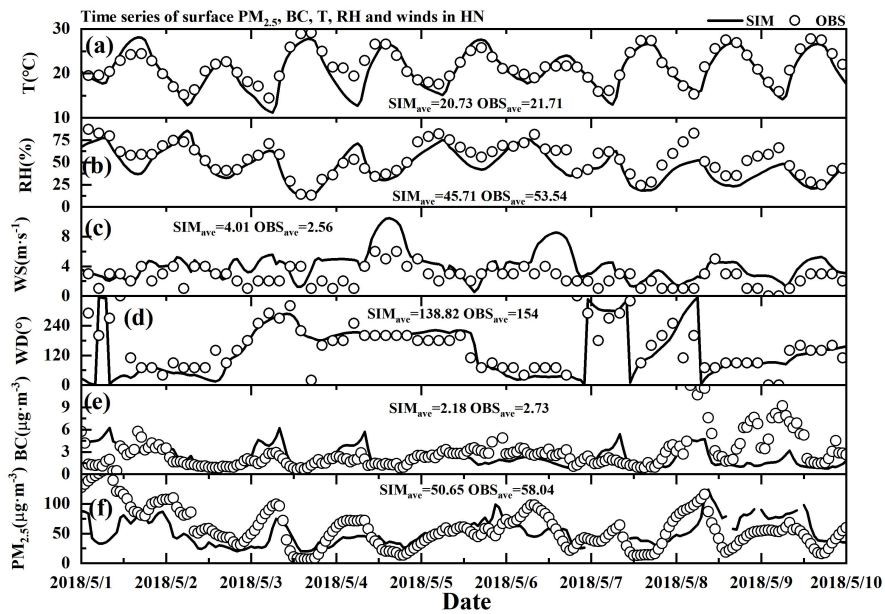

Figure S2. Model validation in HN.

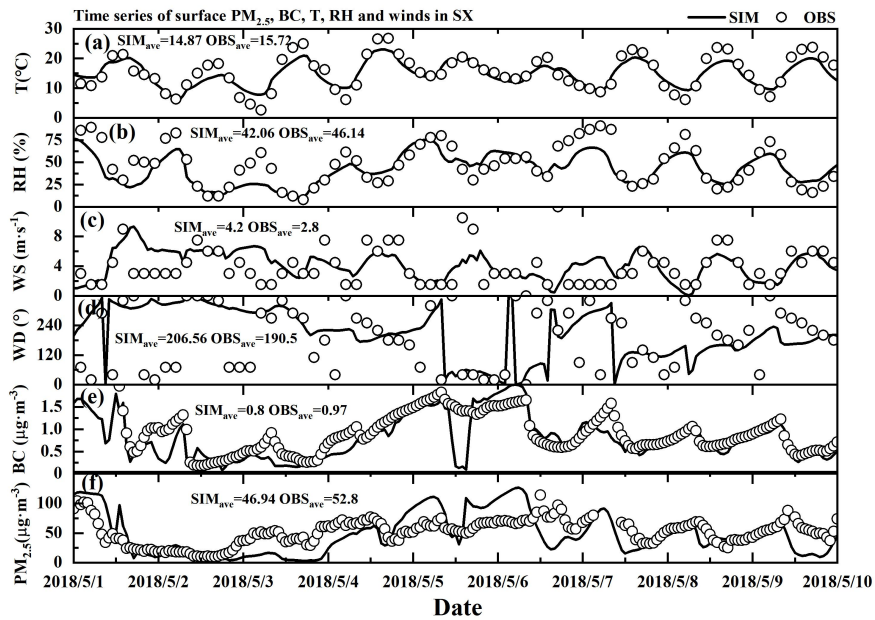

Figure S3. Model validation in SX.

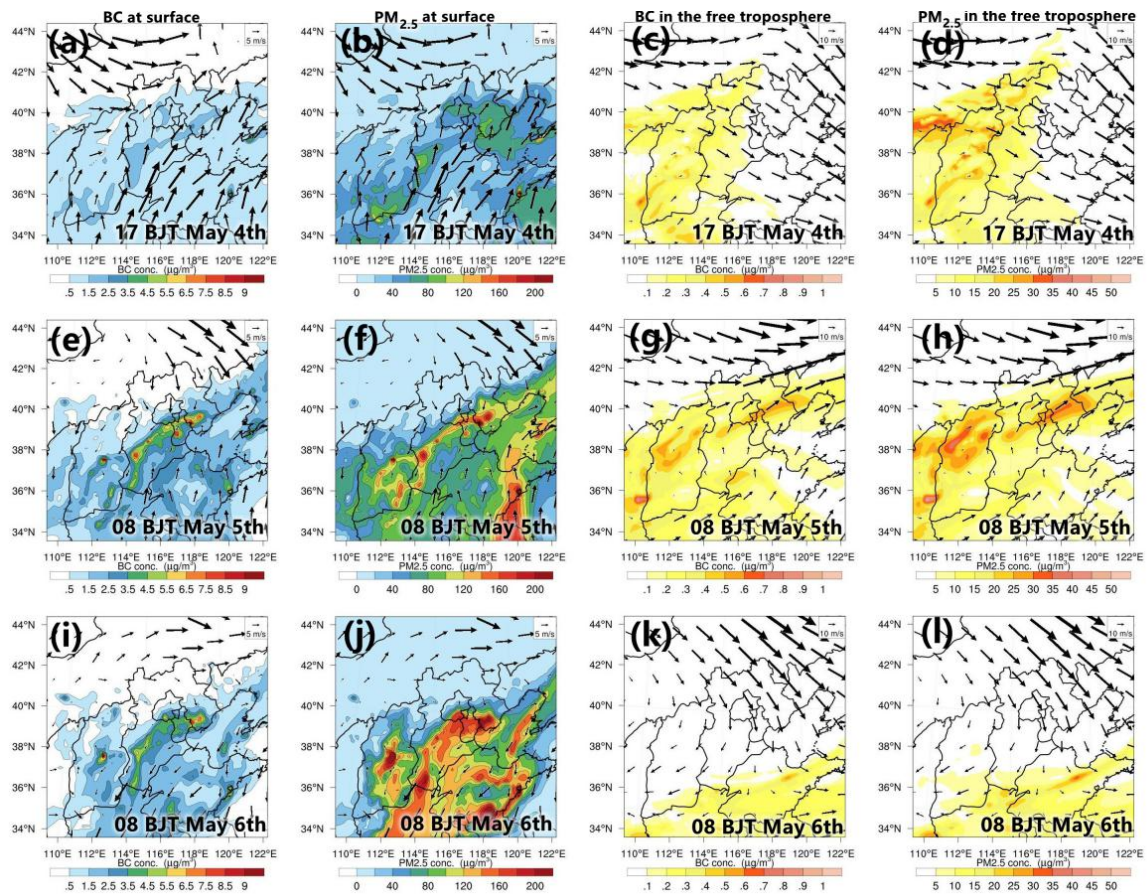

**Figure S4.** Near-surface BC (a, e, i) and PM<sub>2.5</sub> (b, f, j). BC (c, g, k) and PM<sub>2.5</sub> (d, h, k) in the free troposphere.

We acknowledge the use of imagery from NASA's Fire Information for Resource Management System (FIRMS) (<https://earthdata.nasa.gov/firms>), part of NASA's Earth Observing System Data and Information System (EOSDIS). MODIS Collection 6 Hotspot / Active Fire Detections MCD14ML distributed from NASA FIRMS. Available on-line (<https://earthdata.nasa.gov/firms>). doi: <https://earthdata.nasa.gov/earth-observation-data/near-real-time/firms/mcd14ml>.

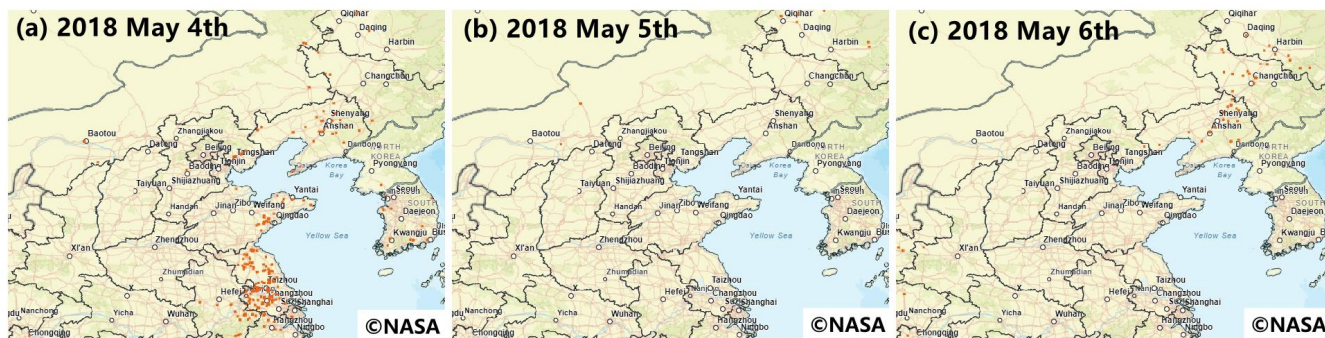

**Figure S5.** Fire maps on (a) May 4th, (b) May 5th and May 6th.



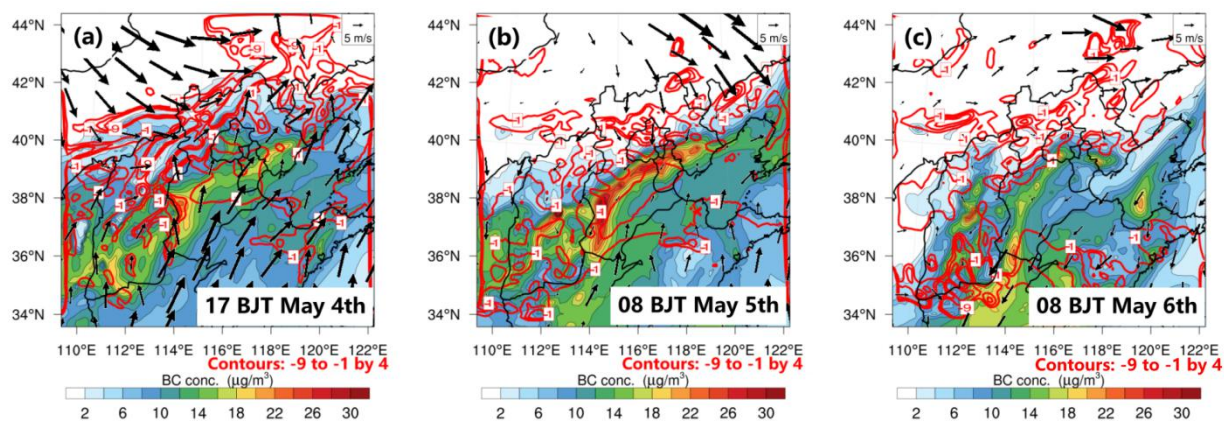

**Figure S6.** The integral results from surface to the free troposphere. The red line represents the convergence region (divergence  $< 0$ ; unit:  $\times 10^{-6} \text{ s}^{-1}$ ).

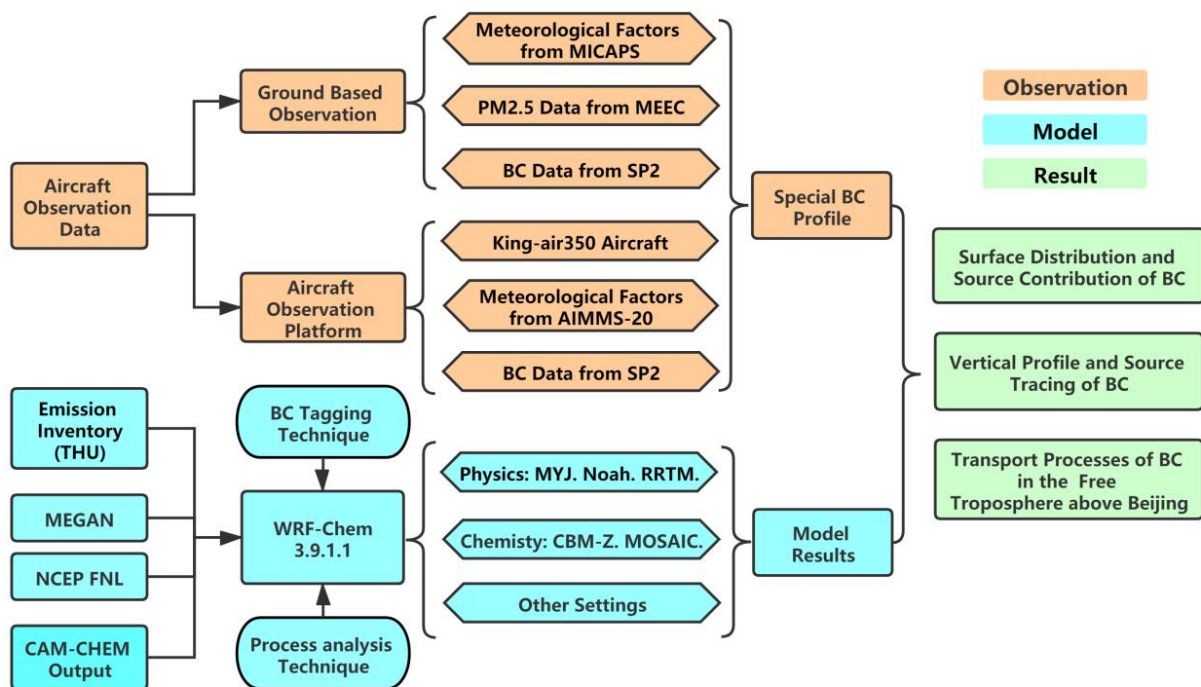

Figure S7. Technical flowchart.
